# Supplementary material for: Structural morphing in a symmetry-mismatched viral vertex
Source: Nat Commun. 2020 Apr 6;11:1713. doi: 10.1038/s41467-020-15575-4 (PMC7136217; doi:10.1038/s41467-020-15575-4)
Supplement: Supplementary file 1 — Supplementary Information [file 41467_2020_15575_MOESM1_ESM.pdf]

# **Structural morphing in a symmetry-mismatched viral vertex**

## **Supplementary Information**

Qianglin Fang et al.

## Supplementary Figures and Figure Legends

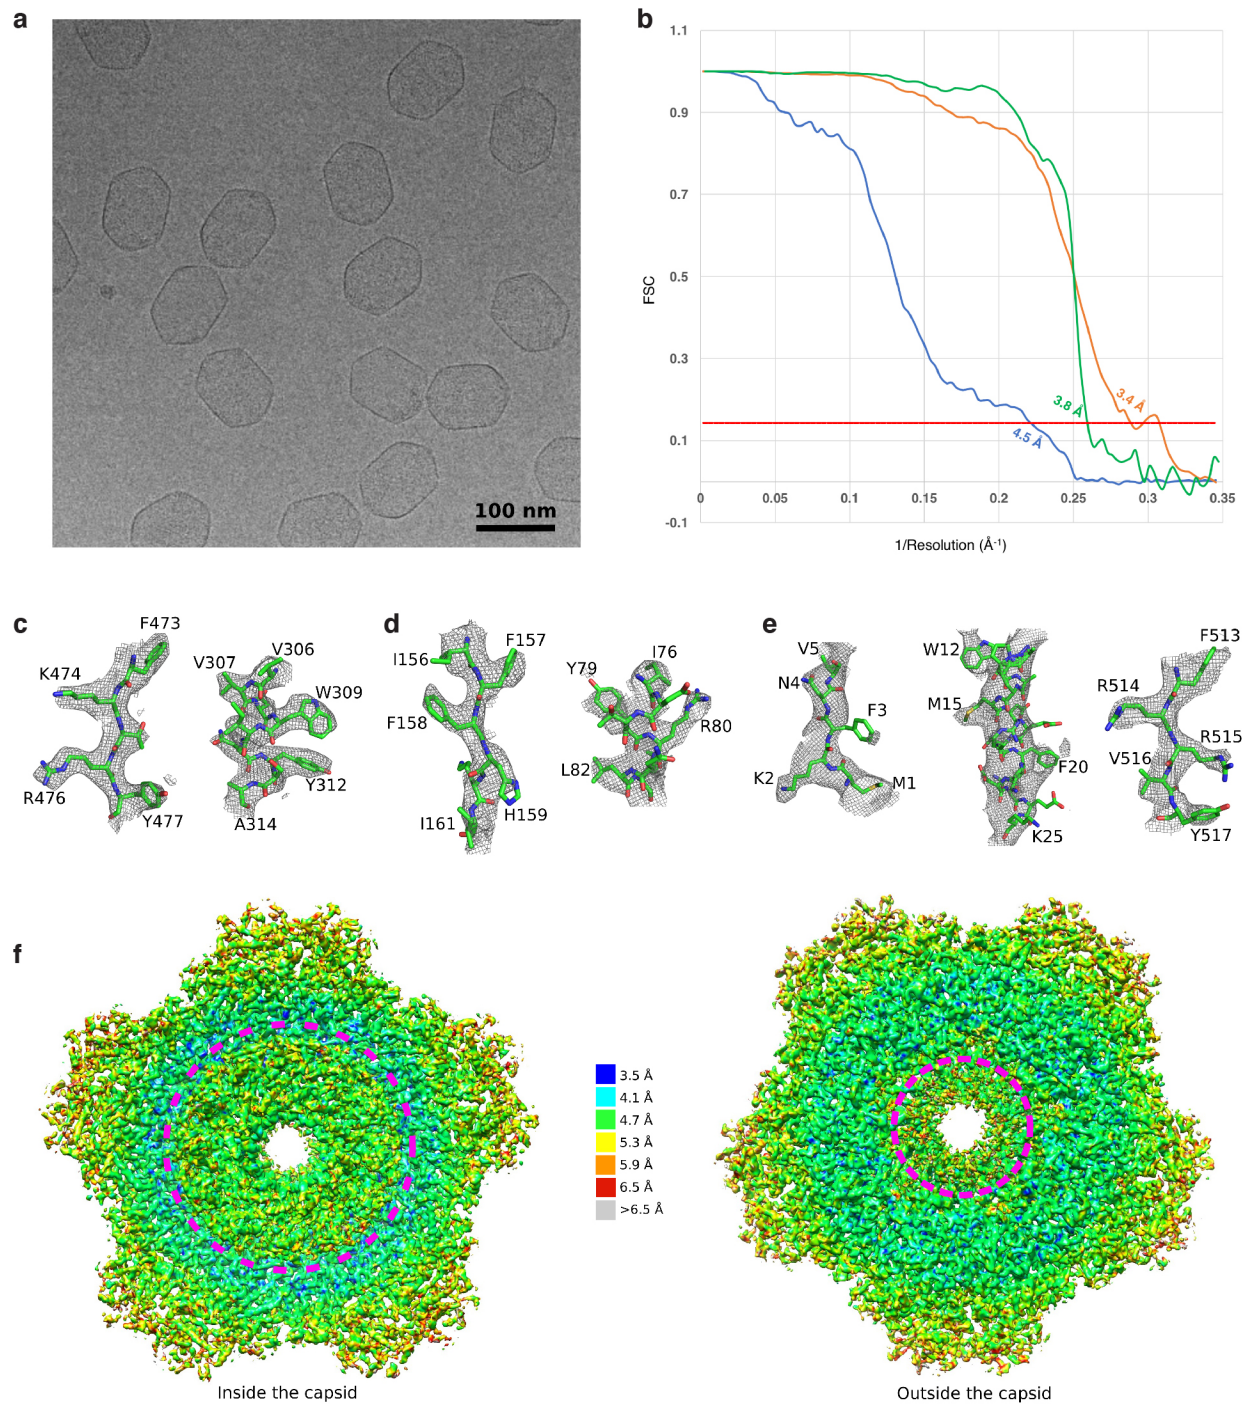

**Supplementary Figure 1. Cryo-EM reconstructions.** **a**, EM image of empty T4 capsids. **b**, FSC curves. The curves of the 12-fold-averaged reconstruction of the portal assembly, the 5-fold-

averaged reconstruction of the gp23\* capsomers surrounding the portal assembly, and the asymmetric reconstruction of the portal and surrounding capsomers are colored in green, orange and blue, respectively. **c**, Cryo-EM density of selected regions in the 5-fold-averaged reconstruction of the gp23\* capsomers surrounding the portal assembly. **d**, Cryo-EM density of selected regions in the 12-fold-averaged reconstruction of the portal protein. **e**, Cryo-EM density of selected regions in the asymmetric reconstruction of the portal and surrounding capsomers. **f**, Local resolution of the asymmetric reconstruction of the portal and surrounding capsomers estimated using the ResMap program<sup>1</sup>. The portal region is outlined by magenta dashed circles.

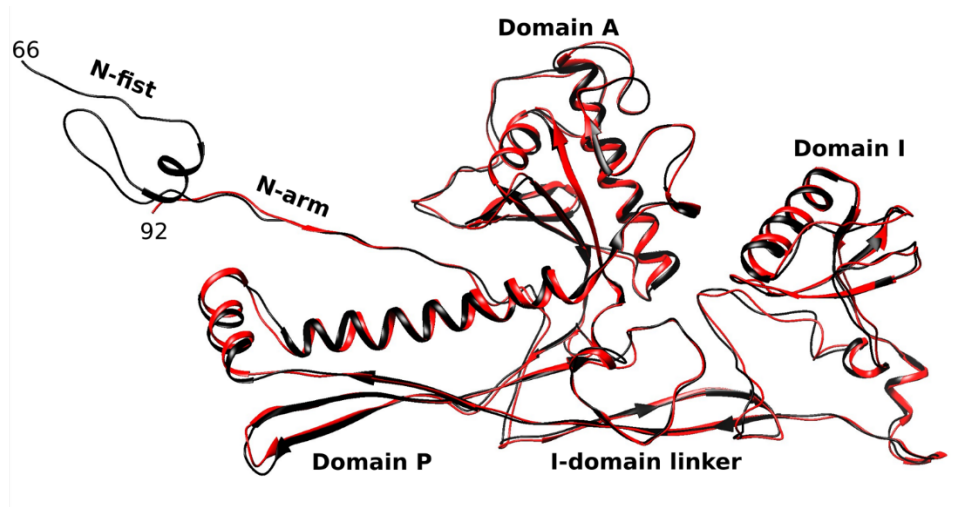

Supplementary Figure 2. Atomic model of gp23 D1 subunit from the *in situ* structure (red) superimposed with a similarly located “distal” gp23 subunit surrounding the gp24 capsomer in the icosahedrally-averaged head structure (black, PDB: 5VF3). Individual domains of gp23 are labeled as in Chen *et al.*<sup>2</sup>.

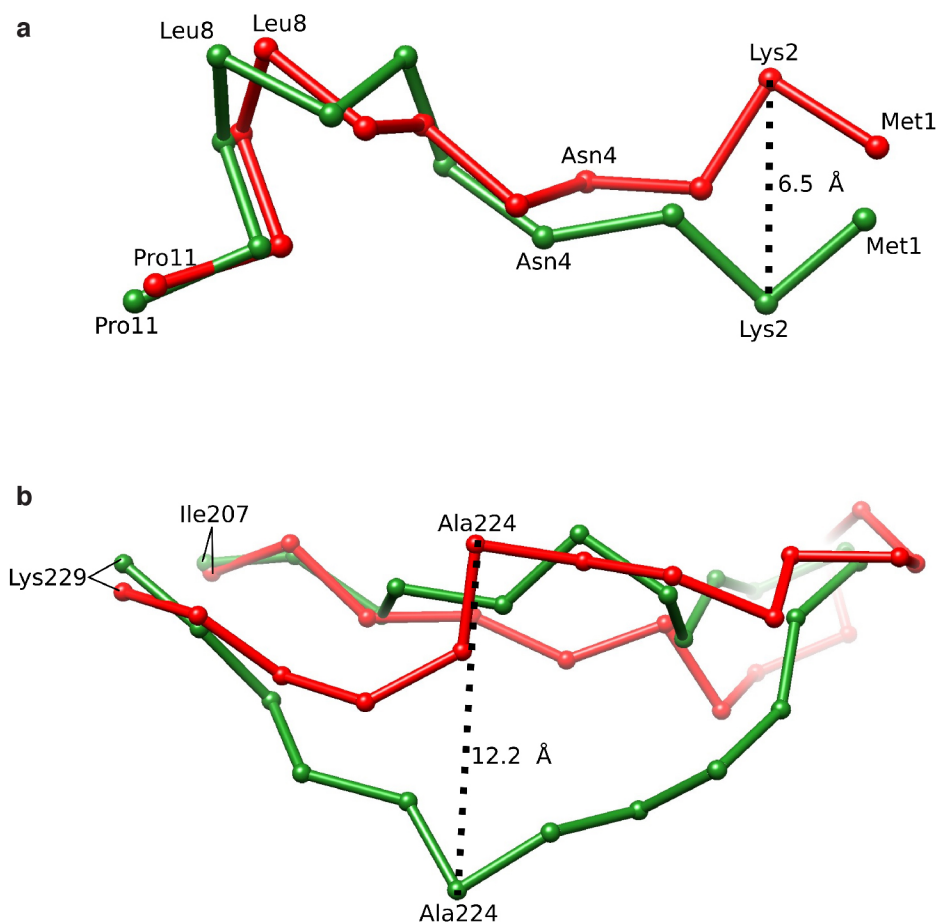

**Supplementary Figure 3. Large conformational differences in some regions of the portal subunits that are involved in forming the portal-capsid interface. a,** The N-whisker regions. The portal subunits 1 (green) and 6 (red) are superposed. The C $\alpha$  traces are shown. **b,** The loop regions Asp207-Lys229. The portal subunits 3 (red) and 7 (green) are superposed.

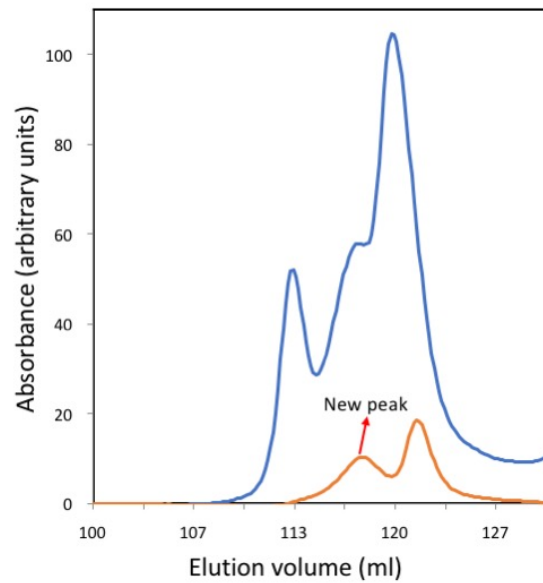

**Supplementary Figure 4. Elution profiles of WT (blue) and 4-del mutant (orange) proheads.**

The proheads were prepared as described in Methods. The first peak in the elution profile of WT proheads corresponds to expanded proheads that are missing in the 4-del mutant and the second peak (with its shoulder) corresponds to unexpanded proheads. A new peak corresponding to partially expanded proheads and round heads of various sizes appears in the 4-del mutant.

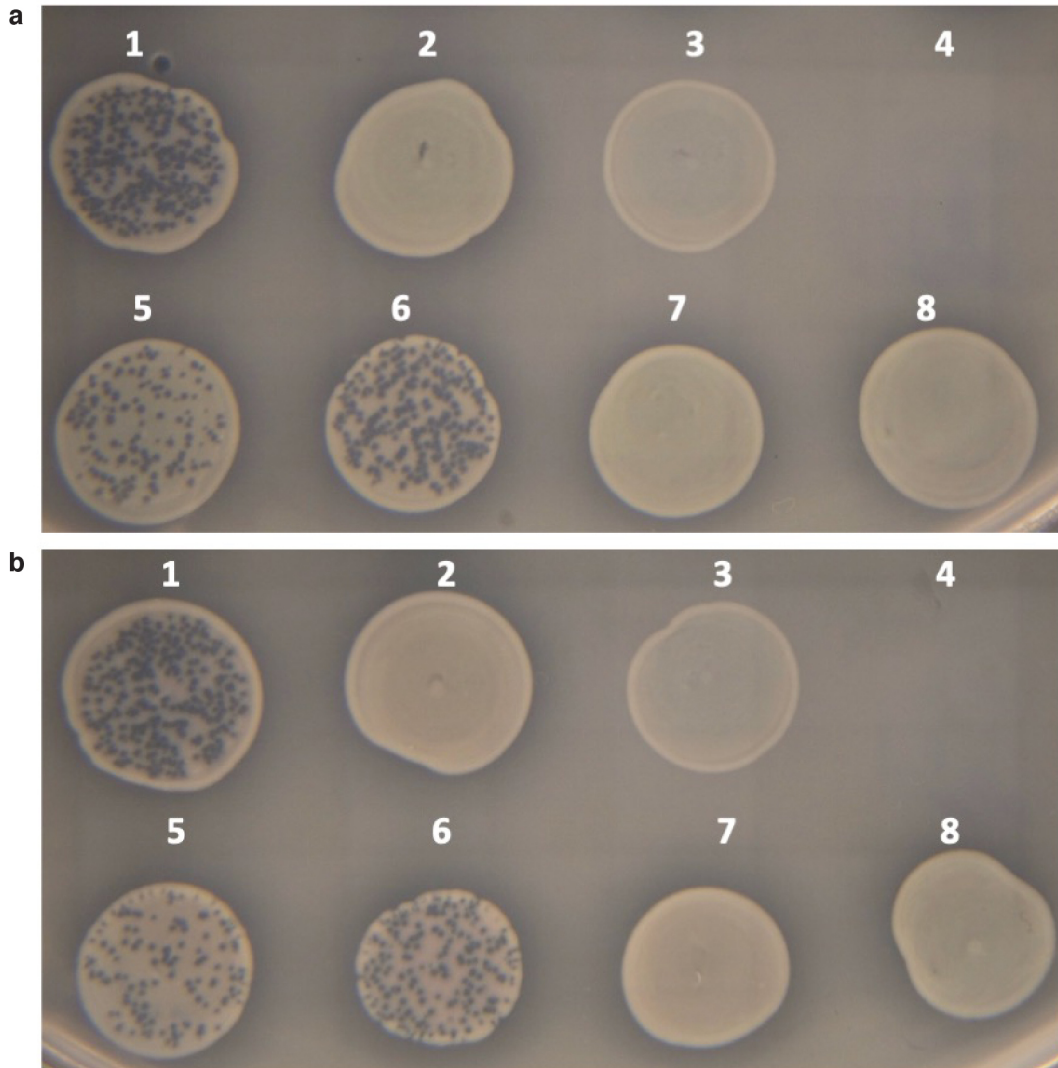

**Supplementary Figure 5. Recombinational rescue of amber mutations in N-whisker of gene 20 by various deletion mutants in N-whisker.** *E. coli* BL21 (*sup*<sup>-</sup>) bacteria containing *g20* donor plasmids with WT (1), one (5), two (6), three (7), or four (8) amino acid deletions in N-whisker were spotted on a lawn of *E. coli* P301 (*sup*<sup>-</sup>). In addition, *E. coli* BL21 bacteria with (2) or without (3) empty plasmid vector (2), or the Lys2-Asn4 double amber T4 mutant phage (4) were also spotted in the same plate to verify that there was no background phage in the negative controls. About  $5 \times 10^4$  amber mutant phages were spotted on top of the *E. coli* BL21 spots (1-3 and 5-8) and the plates were incubated at 37 °C overnight. Plaques would appear only if the

deletion mutant rescued the amber mutations by recombinational exchange. The *E. coli* BL21 containing WT *g20* sequence or empty plasmid served as positive and negative controls, respectively. **a** and **b** correspond to two independent isolates of Lys2-Asn4 double amber mutants.

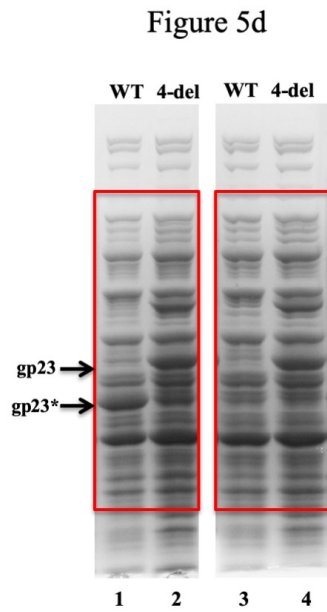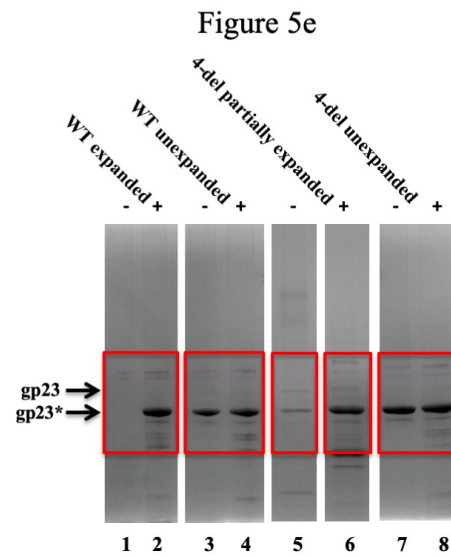

**Supplementary Figure 6. Uncropped protein gels of panels d and e shown in Fig. 5. Red boxes correspond to the areas shown in the respective panels in Fig. 5 of the main paper.**

## Supplementary Table 1

### Cryo-EM data collection, refinement and validation statistics

| Map                                          | C1 map           | C5 map           | C12 map          |
|----------------------------------------------|------------------|------------------|------------------|
| <b>Data collection and processing</b>        |                  |                  |                  |
| Microscope                                   | FEI Titan Krios  | FEI Titan Krios  | FEI Titan Krios  |
| Magnification                                | 14,000           | 14,000           | 14,000           |
| Voltage (kV)                                 | 300              | 300              | 300              |
| Detector                                     | Gatan K2 Summit  | Gatan K2 Summit  | Gatan K2 Summit  |
| Recording mode                               | Super-resolution | Super-resolution | Super-resolution |
| Dose rate (e <sup>-</sup> /(pixel·s))        | 10               | 10               | 10               |
| Frame exposure time (ms)                     | 250              | 250              | 250              |
| Movie micrograph exposure time (s)           | 10               | 10               | 10               |
| Total dose (e <sup>-</sup> /Å <sup>2</sup> ) | 23               | 23               | 23               |
| Defocus range (μm)                           | 1.0-4.0          | 1.0-4.0          | 1.0-4.0          |
| Pixel size (Å)                               | 1.04             | 1.04             | 1.04             |
| Symmetry imposed                             | C1               | C5               | C12              |
| Map resolution (FSC 0.143; Å)                | 4.5              | 3.4              | 3.8              |
| Map sharpening B-factor (Å <sup>2</sup> )    | -180             | -180             | -176             |
| <b>Structure building and Validation</b>     |                  |                  |                  |
| R.m.s. deviations                            |                  |                  |                  |
| Bond lengths (Å)                             | 0.018            |                  |                  |
| Bond angles (°)                              | 1.776            |                  |                  |
| MolProbity score                             | 1.74             |                  |                  |
| Clashscore                                   | 6.47             |                  |                  |
| Poor rotamers (%)                            | 0.26             |                  |                  |
| Ramachandran plot                            |                  |                  |                  |
| Favored (%)                                  | 94.44            |                  |                  |
| Allowed (%)                                  | 4.96             |                  |                  |
| Disallowed (%)                               | 0.60             |                  |                  |

## Supplementary References

1. Kucukelbir, A., Sigworth, F.J. & Tagare, H.D. Quantifying the local resolution of cryo-EM density maps. *Nat. Methods* **11**, 63-65 (2014).
2. Chen, Z. et al. Cryo-EM structure of the bacteriophage T4 isometric head at 3.3-Å resolution and its relevance to the assembly of icosahedral viruses. *Proc. Natl. Acad. Sci. U.S.A.* **114**, E8184-E8193 (2017).
